# Supplementary material
Source: Springer Nature journal article supplement (https://www.springermedizin.de/resource/supplementary/13014_2011_379_MOESM2_ESM.pdf/9633680)

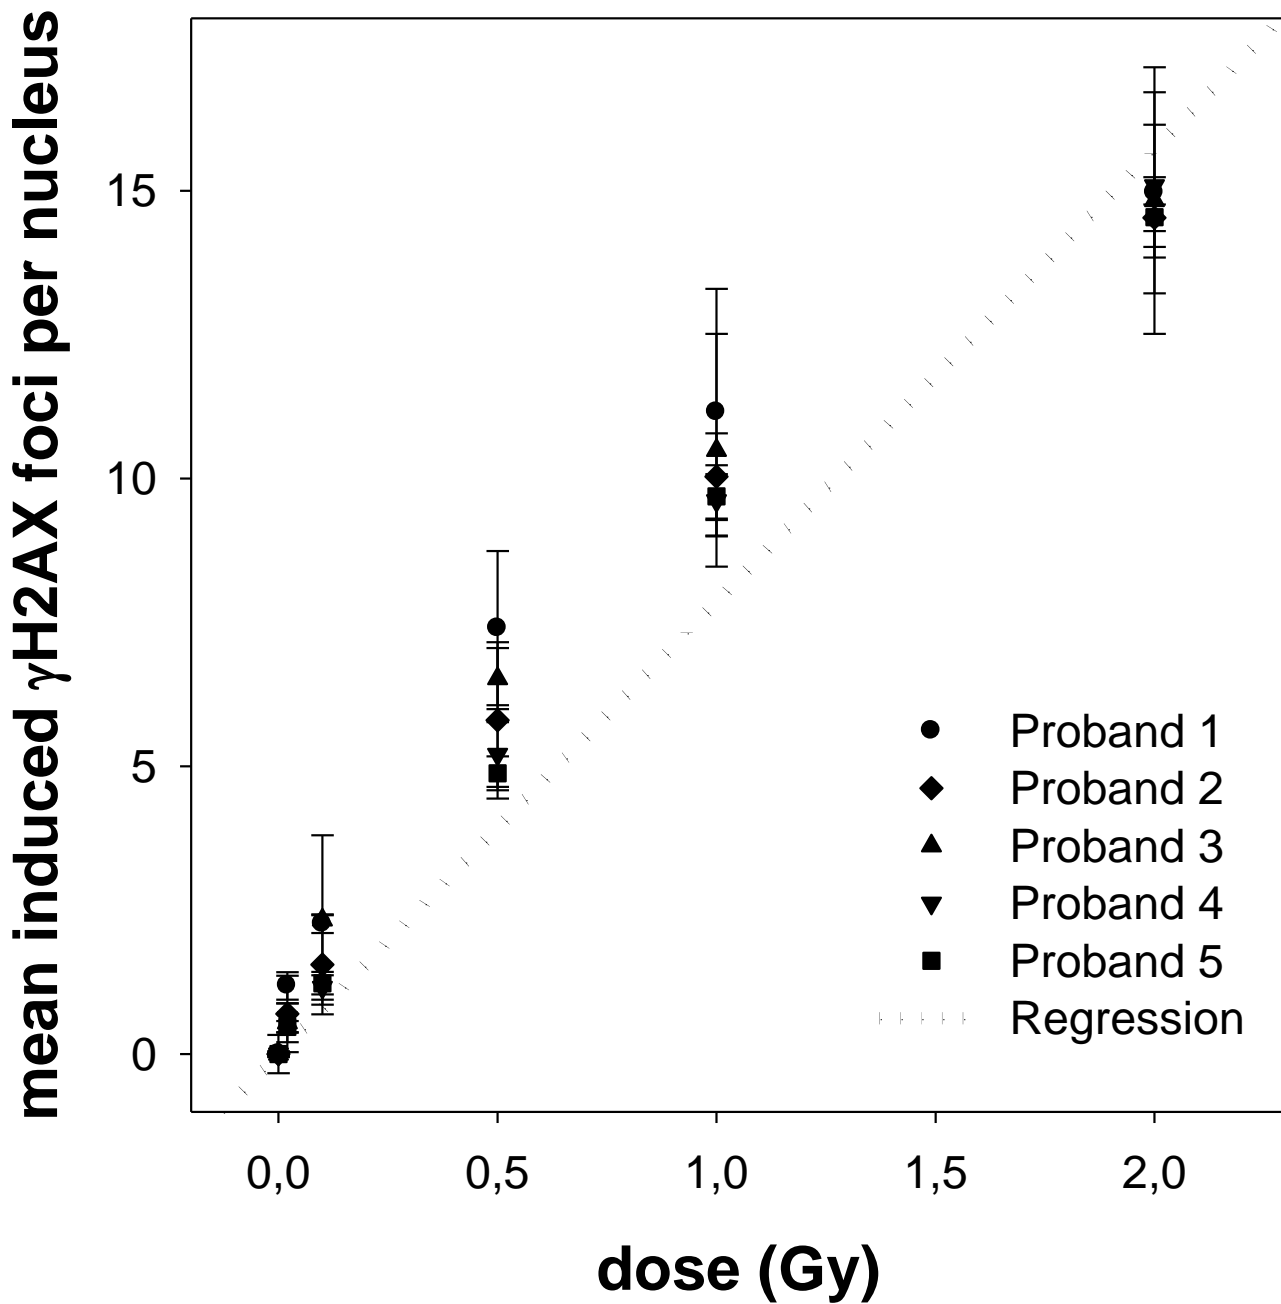

Supplement: MOESM2 [file 9633680]
